# Supplementary material for: Exploring the transition of polydopamine-shelled perfluorohexane emulsion droplets into microbubbles using small- and ultra-small-angle neutron scattering
Source: Royal Society of Chemistry journal article supplement (doi:10.1039/d1cp01146d), 2021-01-01
Supplement: d1cp01146d1.pdf [file d1cp01146d1.pdf]

## ELECTRONIC SUPPORTING INFORMATION

### **Exploring the transition of polydopamine-shelled perfluorohexane emulsion droplets into microbubbles using small- and ultra-small-angle neutron scattering**

Mark Louis P. Vidallon,<sup>a</sup> Luke W. Giles,<sup>a</sup> Simon Crawford,<sup>b</sup> Alexis I. Bishop,<sup>c</sup> Rico F. Tabor,<sup>a</sup> Liliana de Campo,<sup>\*d</sup> and Boon Mian Teo<sup>\*a</sup>

<sup>a</sup> School of Chemistry, Monash University, Clayton, VIC, Australia 3800

<sup>b</sup> Ramaciotti Centre for Cryo-Electron Microscopy, Monash University, Clayton, VIC, Australia 3800

<sup>c</sup> School of Physics and Astronomy, Monash University, Clayton, VIC, Australia 3800

<sup>d</sup> Australian Nuclear Science and Technology Organisation (ANSTO), New Illawarra Rd, Lucas Heights, NSW, Australia 2234

## SUPPLEMENTARY FIGURES

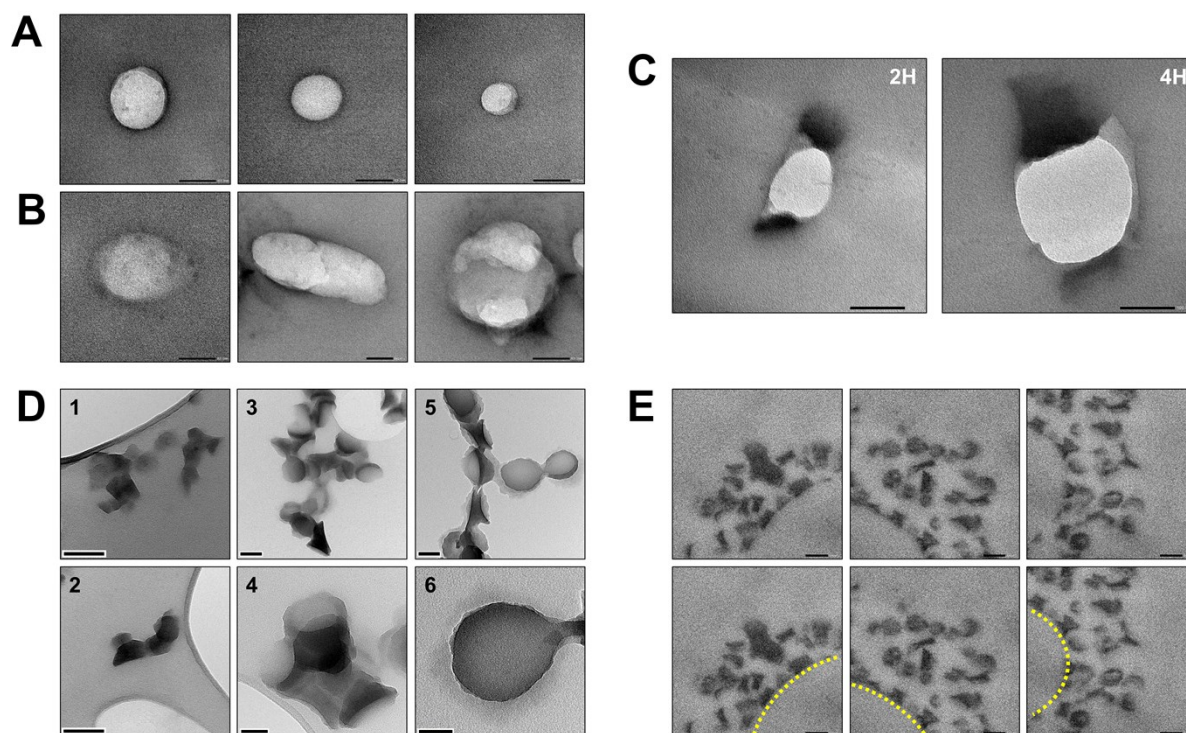

**Figure S1.** Representative transmission electron micrographs. PDA/PFH emulsion droplets with polymerisation times of 2 hours (**A**) and 4 hours (**B**). Emulsion droplets with broken and “flipped” PDA shells (**C**). Collapsed, dried PDA shells of PDA/PFH emulsion droplets with polymerisation times of 1 hour (**D1** and **D2**), 3 hours (**D3** and **D4**), and 5 hours (**D5** and **D6**). Collapsed PDA shells surrounding curved regions that are potentially interfaces of pre-existent emulsions or bubbles (**E**). Yellow lines indicate the suspected interface of the colloidal material. Scale bars = 100 nm (**A**, **B**, **C**, **D1–D3**, **D5**, **D6**, and **E**) and 50 nm (**D4** and **D6**).

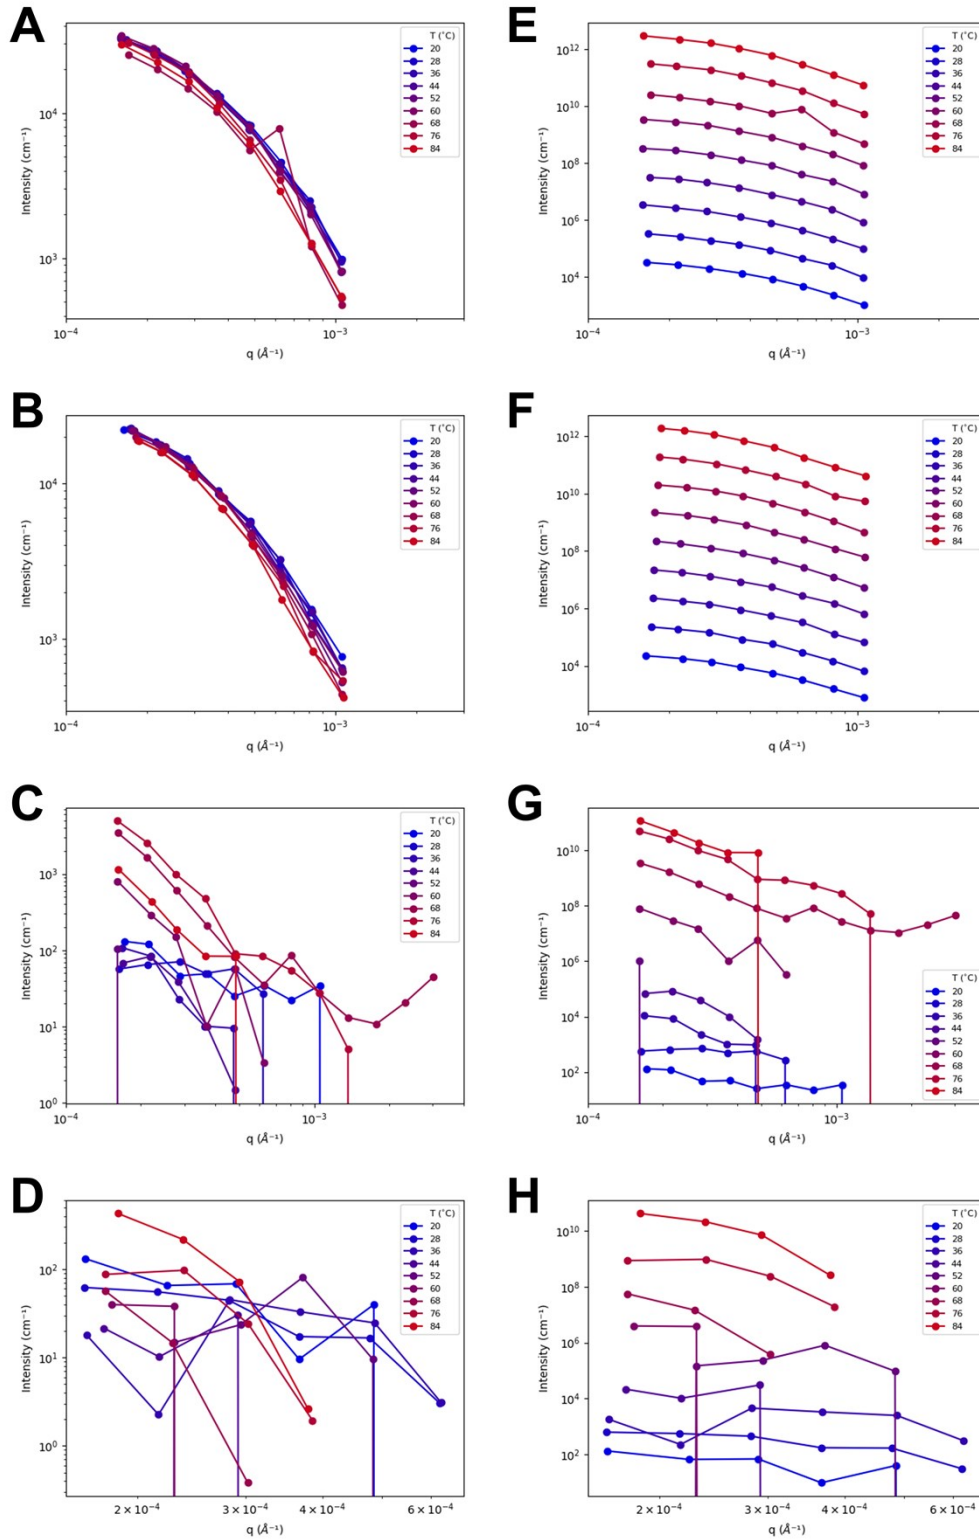

**Figure S2.** 2D plots of the USANS spectra of samples 2H (**A**) and 4H (**B**) in bubble-matched medium (9% D<sub>2</sub>O/ 91% H<sub>2</sub>O) and of samples 2H (**C**) and 4H (**D**) in droplet-matched medium (61% D<sub>2</sub>O/ 39% H<sub>2</sub>O) at different temperatures. **E**, **F**, **G**, and **H** shows **A**, **B**, **C**, and **D**, respectively, with vertical offset (10× original scattering intensity per temperature increment). Scattering intensities in 61% D<sub>2</sub>O/ 39% H<sub>2</sub>O and in 9% D<sub>2</sub>O/ 91% H<sub>2</sub>O arise from microbubbles and emulsion droplets, respectively.

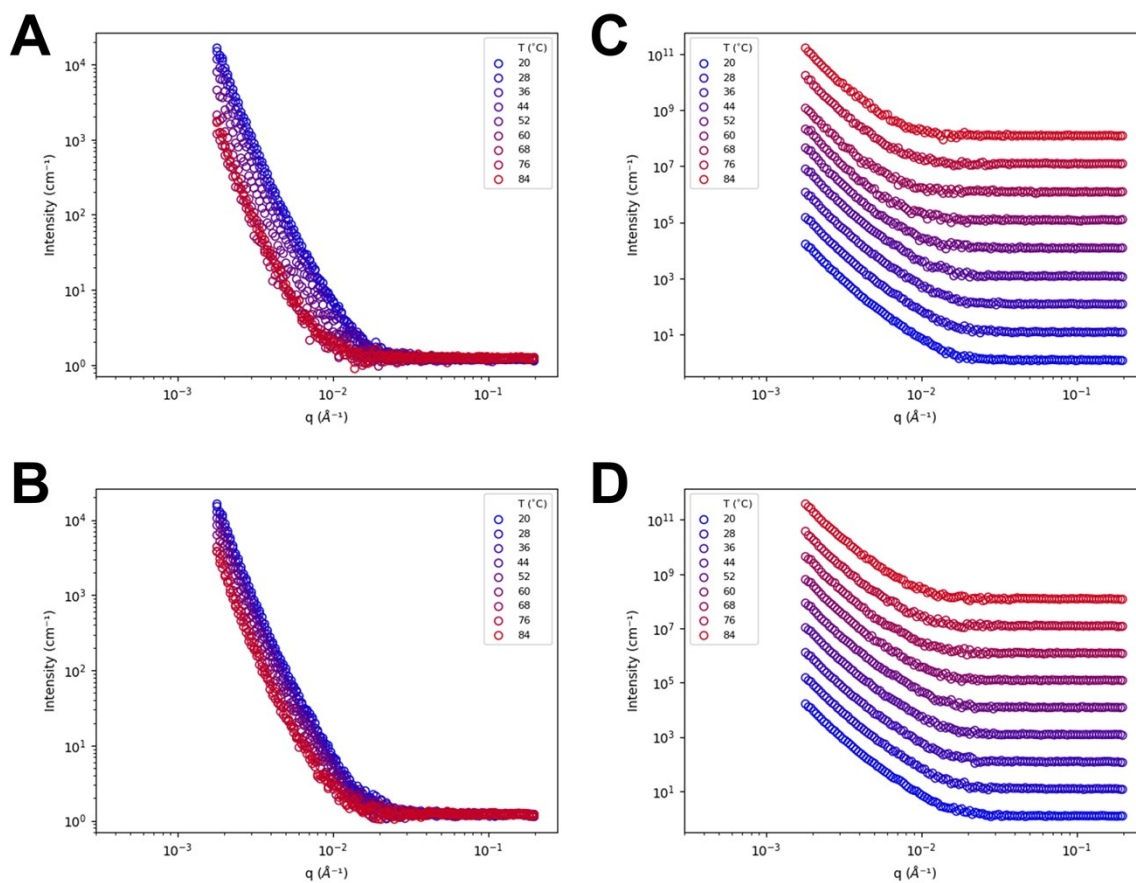

**Figure S3.** 2D plots of the SANS spectra of samples 2H (A) and 4H (B) in bubble-matched medium (9% D<sub>2</sub>O/ 91% H<sub>2</sub>O). C and D shows A and B, respectively, with vertical offset ( $10 \times$  original scattering intensity per temperature increment). Scattering intensities in 9% D<sub>2</sub>O/ 91% H<sub>2</sub>O arise mainly from emulsion droplets.

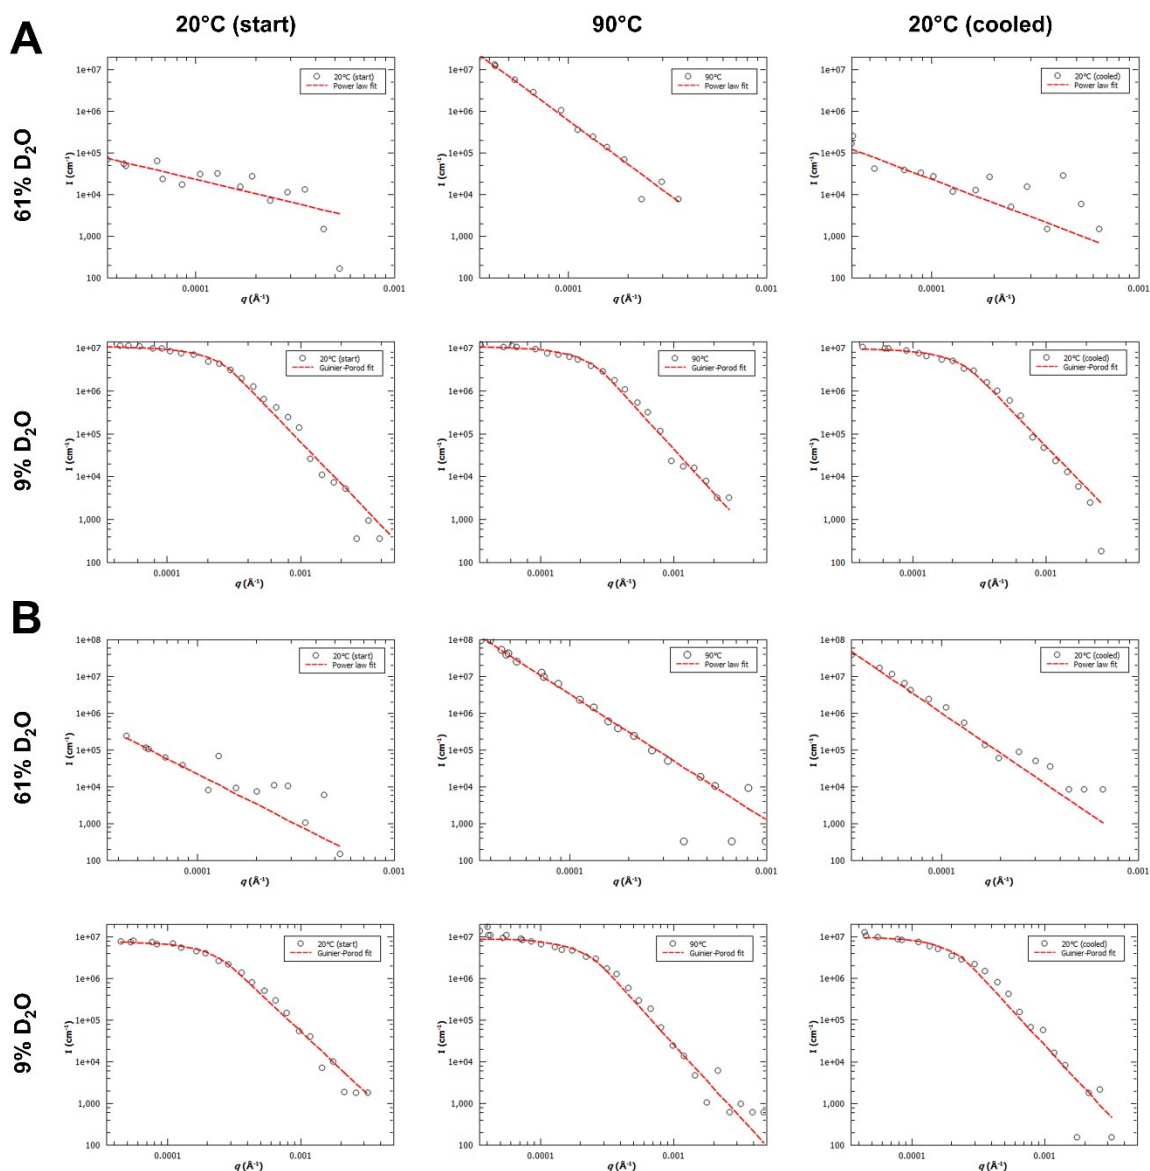

**Figure S4.** Scatter plots and model fitting (red line) of the USANS spectra of PDA/PFH emulsions (polymerisation times = 2 hours (**A**) and 4 hours (**B**)) in different contrast-matched dispersing media at 20°C, 90°C, and 20°C (after cooling from 90°C). Scattering intensities in 61% D<sub>2</sub>O/ 39% H<sub>2</sub>O and in 9% D<sub>2</sub>O/ 91% H<sub>2</sub>O arise from microbubbles and emulsion droplets, respectively.

**Table S1.** Power-law exponents calculated from SANS spectra of emulsion samples in bubble-matched media (9% D<sub>2</sub>O/ 91% H<sub>2</sub>O).

| Temperature (°C) | Power-law exponent |             |
|------------------|--------------------|-------------|
|                  | Sample 2H          | Sample 4H   |
| 20               | 4.00 ± 0.01        | 4.00 ± 0.02 |
| 30               | 4.00 ± 0.01        | 4.00 ± 0.02 |
| 40               | 4.00 ± 0.01        | 4.00 ± 0.01 |
| 50               | 4.00 ± 0.01        | 4.00 ± 0.01 |
| 60               | 4.00 ± 0.01        | 4.00 ± 0.01 |
| 70               | 4.00 ± 0.02        | 4.00 ± 0.01 |
| 80               | 4.00 ± 0.02        | 4.00 ± 0.03 |
| 90               | 4.00 ± 0.02        | 4.00 ± 0.02 |
